# Supplementary material for: Synthetic Applications of Oxidative Aromatic Coupling—From Biphenols to Nanographenes
Source: PubMed Central journal article supplement (PMC7027897; doi:10.1002/anie.201904934), 2019-12-03
Supplement: ANIE-59-2998-s001.pdf [file ANIE-59-2998-s001.pdf]

Supporting Information

**Synthetic Applications of Oxidative Aromatic  
Coupling—From Biphenols to Nanographenes**

*Marek Grzybowski, Bartłomiej Sadowski, Holger Butenschön,\* and  
Daniel T. Gryko\**

anie\_201904934\_sm\_miscellaneous\_information.pdf

## **Author Contributions**

M.G. Conceptualization: Equal; Writing - Original Draft: Lead; Writing - Review & Editing: Equal

B.S. Conceptualization: Equal; Writing - Original Draft: Lead; Writing - Review & Editing: Equal

D.G. Conceptualization: Lead; Supervision: Lead; Writing - Original Draft: Equal; Writing - Review & Editing: Lead.

H.B. Conceptualization: Lead; Supervision: Lead; Writing - Original Draft: Equal; Writing - Review & Editing: Lead.

## 1. Synthesis of small-molecule targets

Intramolecular oxidative coupling of arenes is a convenient method for the synthesis of small-molecule targets such as natural products and drug intermediates, among others. This method is most commonly used for the preparation of 6-membered (benzene) rings, however, in recent years multiple examples of oxidative ring closures of 5-, 7- and 8-membered rings have been reported. The most interesting examples will be discussed in this section.

As demonstrated by Waldvogel and co-workers, MoCl<sub>5</sub> and other Mo<sup>V</sup> reagents are versatile oxidants for both inter- and intramolecular oxidative couplings of arenes.<sup>[S1]</sup> Recently it was shown that fluorene derivatives **S1-S4** can be readily synthesized from the corresponding diarylmethanes *via* Mo<sup>V</sup>-mediated oxidative closure of 5-membered rings (Figure S1).<sup>[S2]</sup> In general, electron-rich aromatic moieties are required for this reaction to occur. Using MoCl<sub>5</sub> as an oxidant, a series of symmetrically or unsymmetrically substituted spirobifluorenes of type **S1** have been prepared in excellent yields. In addition, the authors obtained 9,9-dimethyl-2,3,6,7-tetramethoxyfluorene (**S2**) and spiro-lactam **S3**. MoCl<sub>5</sub> or its analogue with two chlorides substituted with the hexafluoroisopropoxide ligands (MoCl<sub>3</sub>[OCH(CF<sub>3</sub>)<sub>2</sub>]<sub>2</sub>) have also been used in the synthesis of a library of 9-monosubstituted, unsymmetrical fluorenes of the type **S4** (Figure S1).<sup>[S3]</sup>

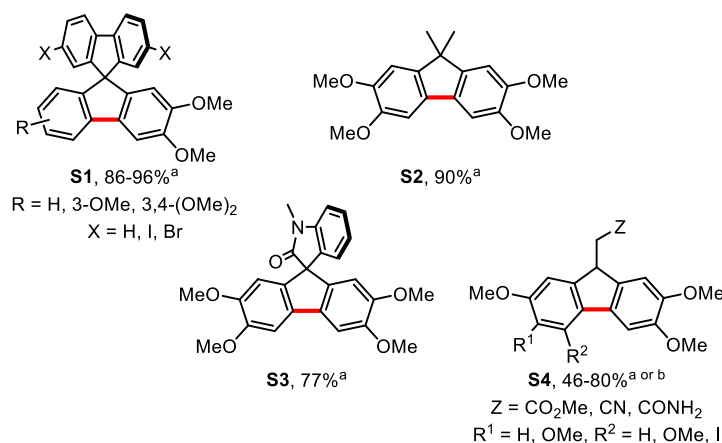

**Figure S1.** Cyclization conditions: a) MoCl<sub>5</sub> (2.2-3.9 eq.), CH<sub>2</sub>Cl<sub>2</sub>, RT; b) MoCl<sub>3</sub>[OCH(CF<sub>3</sub>)<sub>2</sub>]<sub>2</sub> (3 eq.), CH<sub>2</sub>Cl<sub>2</sub>, RT.

The HFIP-modified oxidant generally leads to higher yields of the corresponding fluorenes with reduced amounts of chlorinated side-products, which had been demonstrated earlier on a broader scope of inter- and intramolecular oxidative couplings.<sup>[S4]</sup> A very good example is the oxidation of benzothieryl-substituted fluorene **S5**, which with MoCl<sub>5</sub> proceeds with the formation of chlorinated spiro-bifluorene analogue **S6a** in high yield, whereas MoCl<sub>3</sub>[OCH(CF<sub>3</sub>)<sub>2</sub>]<sub>2</sub> efficiently yields the non-chlorinated product **S6b** (Scheme S1).<sup>[S5]</sup> Similar to fluorenes, carbazoles can also be synthesized from the corresponding di- or triarylamines by Mo<sup>V</sup>-mediated oxidative closure of 5-membered ring.<sup>[S6]</sup>

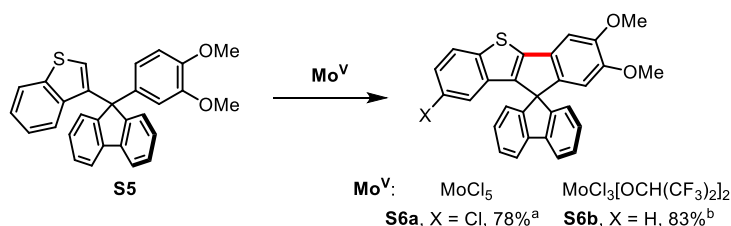

**Scheme S1.** Reaction conditions: a) MoCl<sub>5</sub> (3 eq.), CH<sub>2</sub>Cl<sub>2</sub>, RT; b) MoCl<sub>3</sub>[OCH(CF<sub>3</sub>)<sub>2</sub>]<sub>2</sub> (2 eq.), CH<sub>2</sub>Cl<sub>2</sub>, RT.

Figure S2 depicts some of the small-molecular targets which can be synthesized by oxidative closure of 6-membered rings. As reported by Pelkey and co-workers, PIFA/BF<sub>3</sub>·Et<sub>2</sub>O is a powerful system for the synthesis of phenanthrene derivatives of the type **S7**,<sup>[S7]</sup> as well as its heterocyclic analogues **S8** and **S9** containing indole moieties.<sup>[S8]</sup> These compounds are structurally related to the natural product staurosporine, an inhibitor of protein kinase C, and some of them show enhanced biological activities.<sup>[S7,S8]</sup>

Phenanthrene derivatives such as **S10a-c** are considered as synthetic intermediates for important anti-cancer alkaloids from the phenanthro-quinolizidine and -indolizidine families, i.e. tylophorine and cryptopleurine.<sup>[S9]</sup> The polymethoxy-substituted phenanthrene skeleton can be readily prepared in high yields by cyclization from the corresponding stilbene derivatives using various oxidative conditions: MoCl<sub>5</sub> or MoCl<sub>5</sub>/TiCl<sub>4</sub>,<sup>[S9]</sup> CAN,<sup>[S10]</sup> or dehydrogenation with 5% Pd on Al<sub>2</sub>O<sub>3</sub> in an atmosphere of oxygen (**S10a-c**, Figure S2).<sup>[S11]</sup> The presence of TiCl<sub>4</sub> in the MoCl<sub>5</sub>-mediated oxidation greatly improves the yield of phenanthrene **S10a** from 80% to 98%.<sup>[S9]</sup> Higher yields are attributed to the HCl-scavenging properties of TiCl<sub>4</sub>, which minimizes unwanted chlorination.<sup>[S12]</sup> Dehydrogenation with Pd/Al<sub>2</sub>O<sub>3</sub> under oxygen proved to be an excellent method for the synthesis of triphenylenes, such as **S11a-g**.<sup>[S11]</sup> A similar range of triphenylene derivatives can also be obtained through indirect anodic oxidation in the presence of 5 mol% of DDQ as a redox mediator.<sup>[S13]</sup>

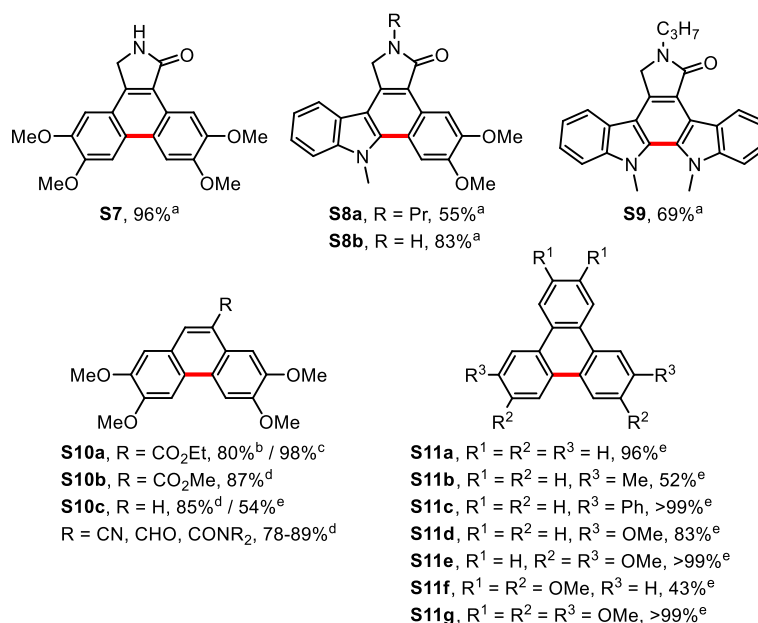

**Figure S2.** Selected examples of oxidative 6-membered ring closures. Reaction conditions: a) PIFA (1.1 eq.), BF<sub>3</sub>·Et<sub>2</sub>O (1.2 eq.), CH<sub>2</sub>Cl<sub>2</sub>, -40 °C; b) MoCl<sub>5</sub> (2.2 eq.), CH<sub>2</sub>Cl<sub>2</sub>, RT; c) MoCl<sub>5</sub> (2.2 eq.), TiCl<sub>4</sub> (2.3 eq.), CH<sub>2</sub>Cl<sub>2</sub>, 0 °C; d) CAN (2 eq.), NaHCO<sub>3</sub> (4 eq.), CH<sub>3</sub>CN, RT; e) 5% Pd/Al<sub>2</sub>O<sub>3</sub> (5 mol%), O<sub>2</sub> (1 atm), TfOH or MsOH, TFE or HFIP, RT.

Similar cyclizations involving two thienyl groups in the formation of 6-membered rings were performed using FeCl<sub>3</sub>, MoCl<sub>5</sub> or DDQ as oxidants in the syntheses of various sulfur-doped PAHs.<sup>[S5, S14–S20]</sup>

DDQ<sup>[S21]</sup> or MnO<sub>2</sub><sup>[S22]</sup> in the presence of BF<sub>3</sub>·Et<sub>2</sub>O enable the efficient oxidative closure of 7- and 8-membered rings leading to compounds **S12a-d** and **S13a-d**, respectively, when precursors bearing electron-rich aryl substituents are used as the starting materials (Figure S3).

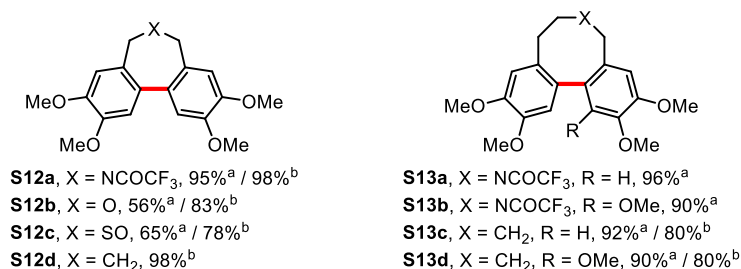

**Figure S3.** Oxidative closure of 7- and 8-membered rings. Reaction conditions: a) DDQ (1 eq.), BF<sub>3</sub>·Et<sub>2</sub>O (12 eq.), CH<sub>2</sub>Cl<sub>2</sub>, RT; b) MnO<sub>2</sub> (6 eq.), BF<sub>3</sub>·Et<sub>2</sub>O (3 eq.), CH<sub>2</sub>Cl<sub>2</sub>, RT.

An interesting method for the oxidative construction of 7-membered rings has been discovered by Du, Zhao and co-workers (Scheme S2).<sup>[S23]</sup> Upon treatment with PIDA in boiling acetonitrile, benzanilides **S14**, bearing an acetylated amino group at the *ortho*-position relative to the benzanilide carbonyl, underwent oxidative cyclization accompanied by a ring-expanding rearrangement to give biaryl-bridged, 7-membered ring-based ureas **S15** in moderate to good yields. Some mechanistic insights into this process were provided by the fact that the analogous transformation proceeds for hydroxybenzanilides **S16** with PIFA as an oxidant. In this case, however, the reaction is a two-step process and addition of BF<sub>3</sub>·Et<sub>2</sub>O is necessary to convert the initially forming spirocyclic intermediate **S17** into the cyclic carbamates **S18**. The authors suggested that the formation of ureas **S15** also involves a 5-membered-ring intermediate.

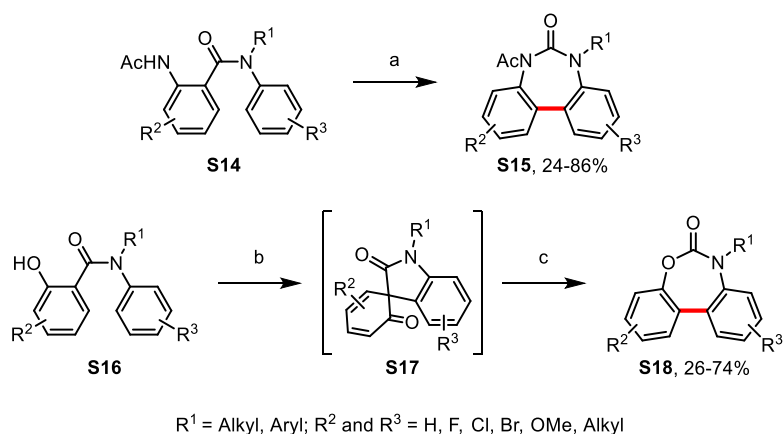

**Scheme S2.** Oxidative coupling with a rearrangement to a 7-membered ring. Reaction conditions: a) PIDA (3 eq.), CH<sub>3</sub>CN, reflux; b) PIFA (1.3 eq.), CH<sub>2</sub>Cl<sub>2</sub>, -35 °C or 0 °C; c) BF<sub>3</sub>·Et<sub>2</sub>O (0.3 eq.), RT.

## References

- [S1] S. R. Waldvogel, S. Trosien, *Chem. Commun.* **2012**, *48*, 9109–9119.
- [S2] S. Trosien, D. Schollmeyer, S. R. Waldvogel, *Synthesis* **2013**, *45*, 1160–1164.
- [S3] P. Franzmann, S. Trosien, M. Schubert, S. R. Waldvogel, *Org. Lett.* **2016**, *18*, 1182–1185.
- [S4] M. Schubert, J. Leppin, K. Wehming, D. Schollmeyer, K. Heinze, S. R. Waldvogel, *Angew. Chem. Int. Ed.* **2014**, *53*, 2494–2497.
- [S5] M. Schubert, S. Trosien, L. Schulz, C. Brscheid, D. Schollmeyer, S. R. Waldvogel, *Eur. J. Org. Chem.* **2014**, *2014*, 7091–7094.
- [S6] S. Trosien, P. Böttger, S. R. Waldvogel, *Org. Lett.* **2014**, *16*, 402–405.
- [S7] A. A. Van Loon, M. K. Holton, C. R. Downey, T. M. White, C. E. Rolph, S. R. Bruening, G. Li, K. M. Delaney, S. J. Pelkey, E. T. Pelkey, *J. Org. Chem.* **2014**, *79*, 8049–8058.
- [S8] N. J. Truax, F. Banales Mejia, D. O. Kwansare, M. M. Lafferty, M. H. Kean, E. T. Pelkey, *J. Org. Chem.* **2016**, *81*, 6808–6815.
- [S9] K. Wehming, M. Schubert, G. Schnakenburg, S. R. Waldvogel, *Chem. Eur. J.* **2014**, *20*, 12463–12469.
- [S10] V. Gupta, V. U. B. Rao, T. Das, K. Vanka, R. P. Singh, *J. Org. Chem.* **2016**, *81*, 5663–5669.
- [S11] S. Fujimoto, K. Matsumoto, M. Shindo, *Adv. Synth. Catal.* **2016**, *358*, 3057–3061.
- [S12] B. Kramer, R. Fröhlich, S. R. Waldvogel, *Eur. J. Org. Chem.* **2003**, 3549–3554.
- [S13] P. Röse, S. Emge, C. A. König, G. Hilt, *Adv. Synth. Catal.* **2017**, *359*, 1359–1372.
- [S14] D. Waghray, C. De Vet, K. Karypidou, W. Dehaen, *J. Org. Chem.* **2013**, *78*, 11147–11154.
- [S15] Z. Li, J. Zhang, K. Zhang, W. Zhang, L. Guo, J. Huang, G. Yu, M. S. Wong, *J. Mater. Chem. C* **2015**, *3*, 8024–8029.
- [S16] R. Q. Lu, Y. N. Zhou, X. Y. Yan, K. Shi, Y. Q. Zheng, M. Luo, X. C. Wang, J. Pei, H. Xia, L. Zoppi, et al., *Chem. Commun.* **2015**, *51*, 1681–1684.
- [S17] W. Zhang, X. Sun, P. Xia, J. Huang, G. Yu, M. S. Wong, Y. Liu, D. Zhu, *Org. Lett.* **2012**, *14*, 4382–4385.
- [S18] C. Quinton, M. Suzuki, Y. Kaneshige, Y. Tatenaka, C. Katagiri, Y. Yamaguchi, D. Kuzuhara, N. Aratani, K. Nakayama, H. Yamada, *J. Mater. Chem. C* **2015**, *3*, 5995–6005.
- [S19] Q. Ye, Z. Zhang, Z. M. Png, W. T. Neo, T. Lin, H. Zeng, H. Xu, J. Xu, *J. Org. Chem.* **2016**, *81*, 9219–9226.
- [S20] L. Zöphel, V. Enkelmann, R. Rieger, K. Müllen, *Org. Lett.* **2011**, *13*, 4506–4509.
- [S21] S. Sun, J. Yang, F. Li, Z. Lv, W. Li, H. Lou, L. Liu, *Tetrahedron Lett.* **2014**, *55*, 6899–6902.
- [S22] J. Yang, S. Sun, Z. Zeng, H. Zheng, W. Li, H. Lou, L. Liu, *Org. Biomol. Chem.* **2014**, *12*, 7774–7779.
- [S23] S. Shang, D. Zhang-Negrierie, Y. Du, K. Zhao, *Angew. Chem. Int. Ed.* **2014**, *53*, 6216–6219.
